# Supplementary material
Source: PubMed Central journal article supplement (PMC4790791)
Supplement: ciao006838.wt1_default.pdf [file ciao006838.wt1_default.pdf]

### Search strategy (via PubMed Search Builder)

| Search | Query                                                                                                                                                         | Items found |
|--------|---------------------------------------------------------------------------------------------------------------------------------------------------------------|-------------|
| 1      | Search "Annals of internal medicine"[Journal] Filters: Publication date from 2005/01/01 to 2006/12/31; Randomized Controlled Trial                            | 59          |
| 2      | Search "BMJ"[Journal] Filters: Publication date from 2005/01/01 to 2006/12/31; Randomized Controlled Trial                                                    | 122         |
| 3      | Search "JAMA : the journal of the American Medical Association"[Journal] Filters: Publication date from 2005/01/01 to 2006/12/31; Randomized Controlled Trial | 113         |
| 4      | Search "Lancet"[Journal] Filters: Publication date from 2005/01/01 to 2006/12/31; Randomized Controlled Trial                                                 | 129         |
| 5      | Search "The New England journal of medicine"[Journal] Filters: Publication date from 2005/01/01 to 2006/12/31; Randomized Controlled Trial                    | 208         |
| 6      | Search "PLoS medicine"[Journal] Filters: Publication date from 2005/01/01 to 2006/12/31; Randomized Controlled Trial                                          | 8           |
