# Supplementary material
Source: PubMed Central journal article supplement (PMC4790791)
Supplement: ciao006838.wt2_default.pdf [file ciao006838.wt2_default.pdf]

### Characteristics of trials included in the pair-matched analysis

| Pair | Author               | Primary endpoint | Disease classification<br>Intervention | Disease classification<br>Population | Journal | Year |
|------|----------------------|------------------|----------------------------------------|--------------------------------------|---------|------|
| 1    | Ananworanich et al.  | Surrogate        | Infectious disease                     | Infectious disease                   | Lancet  | 2006 |
|      | Laufer et al.        | Final            | Infectious disease                     | Infectious disease                   | NEJM    | 2006 |
| 2    | Arber et al.         | Surrogate        | Gastrology and hepatology              | Gastrology and hepatology            | NEJM    | 2006 |
|      | Ruiz-Palacios et al. | Final            | Gastrology and hepatology              | Gastrology and hepatology            | NEJM    | 2006 |
| 3    | Barlogie et al.      | Surrogate        | Oncology                               | Oncology                             | NEJM    | 2006 |
|      | Cunningham et al.    | Final            | Oncology                               | Oncology                             | NEJM    | 2006 |
| 4    | Bertagnolli et al.   | Surrogate        | Gastrology and hepatology              | Gastrology and hepatology            | NEJM    | 2006 |
|      | Vesikari et al.      | Final            | Gastrology and hepatology              | Gastrology and hepatology            | NEJM    | 2006 |
| 5    | Burns et al.         | Surrogate        | Cardiovascular                         | Cardiovascular                       | JAMA    | 2005 |
|      | Binanay et al.       | Final            | Cardiovascular                         | Cardiovascular                       | JAMA    | 2005 |
| 6    | Buttery et al.       | Surrogate        | Infectious disease                     | Infectious disease                   | JAMA    | 2005 |
|      | Oosterheert et al.   | Final            | Infectious disease                     | Infectious disease                   | BMJ     | 2006 |
| 7    | Casarett et al.      | Surrogate        | Oncology                               | Oncology                             | JAMA    | 2005 |
|      | Cook et al.          | Final            | Oncology                               | Oncology                             | JAMA    | 2005 |
| 8    | Chan et al.          | Surrogate        | Infectious disease                     | Infectious disease                   | Annals  | 2005 |
|      | Carratala et al.     | Final            | Infectious disease                     | Infectious disease                   | Annals  | 2005 |
| 9    | Chanoine et al.      | Surrogate        | Other                                  | Other                                | JAMA    | 2005 |
|      | Lonn et al.          | Final            | Other                                  | Other                                | JAMA    | 2005 |
| 10   | Cooper et al.        | Surrogate        | Infectious disease                     | Other                                | Lancet  | 2006 |
|      | Prymula et al.       | Final            | Infectious disease                     | Other                                | Lancet  | 2006 |

|    |                    |           |                           |                           |        |      |
|----|--------------------|-----------|---------------------------|---------------------------|--------|------|
| 11 | Coutinho et al.    | Surrogate | Other                     | Other                     | Lancet | 2005 |
|    | Squadrone et al.   | Final     | Other                     | Other                     | JAMA   | 2005 |
| 12 | Cutts et al.       | Surrogate | Infectious disease        | Pulmunology               | Lancet | 2005 |
|    | Loeb et al.        | Final     | Infectious disease        | Pulmunology               | JAMA   | 2006 |
| 13 | Darmstadt et al.   | Surrogate | Infectious disease        | Other                     | Lancet | 2005 |
|    | Rose et al.        | Final     | Infectious disease        | Other                     | Lancet | 2005 |
| 14 | Doukas et al.      | Surrogate | Cardiovascular            | Cardiovascular            | JAMA   | 2005 |
|    | Lee et al.         | Final     | Cardiovascular            | Cardiovascular            | JAMA   | 2005 |
| 15 | Golden et al.      | Surrogate | Infectious disease        | Infectious disease        | NEJM   | 2005 |
|    | Abraham et al.     | Final     | Infectious disease        | Infectious disease        | NEJM   | 2005 |
| 16 | Groszmann et al.   | Surrogate | Gastrology and hepatology | Gastrology and hepatology | NEJM   | 2005 |
|    | Rutgeerts et al.   | Final     | Gastrology and hepatology | Gastrology and hepatology | NEJM   | 2005 |
| 17 | Gulick et al.      | Surrogate | Infectious disease        | Infectious disease        | JAMA   | 2006 |
|    | SMART et al.       | Final     | Infectious disease        | Infectious disease        | NEJM   | 2006 |
| 18 | Hadziyannis et al. | Surrogate | Gastrology and hepatology | Gastrology and hepatology | NEJM   | 2005 |
|    | Sandborn et al.    | Final     | Gastrology and hepatology | Gastrology and hepatology | NEJM   | 2005 |
| 19 | Julius et al.      | Surrogate | Cardiovascular            | Cardiovascular            | NEJM   | 2006 |
|    | Lonn et al.        | Final     | Cardiovascular            | Cardiovascular            | NEJM   | 2006 |
| 20 | Kastrati et al.    | Surrogate | Cardiovascular            | Cardiovascular            | JAMA   | 2005 |
|    | Mahaffey et al.    | Final     | Cardiovascular            | Cardiovascular            | JAMA   | 2005 |
| 21 | Kelly et al.       | Surrogate | Infectious disease        | Infectious disease        | BMJ    | 2006 |
|    | Hayward et al.     | Final     | Infectious disease        | Infectious disease        | BMJ    | 2006 |
| 22 | Lai et al.         | Surrogate | Gastrology and hepatology | Gastrology and hepatology | NEJM   | 2006 |
|    | Fitzgibbons et al. | Final     | Gastrology and            | Gastrology and            | JAMA   | 2006 |

|    |                    |           |                           |                           |        |      |
|----|--------------------|-----------|---------------------------|---------------------------|--------|------|
|    |                    |           | hepatology                | hepatology                |        |      |
| 23 | Lau et al.         | Surrogate | Gastrology and hepatology | Gastrology and hepatology | NEJM   | 2005 |
|    | Korzenik et al.    | Final     | Gastrology and hepatology | Gastrology and hepatology | NEJM   | 2005 |
| 24 | Lee et al.         | Surrogate | Other                     | Cardiovascular            | JAMA   | 2006 |
|    | Howard et al.      | Final     | Other                     | Cardiovascular            | JAMA   | 2006 |
| 25 | Michalowicz et al. | Surrogate | Other                     | Obstetrics                | NEJM   | 2006 |
|    | Raine et al.       | Final     | Other                     | Obstetrics                | JAMA   | 2005 |
| 26 | Moll et al.        | Surrogate | Obstetrics                | Obstetrics                | BMJ    | 2006 |
|    | Dodd et al.        | Final     | Obstetrics                | Obstetrics                | BMJ    | 2006 |
| 27 | Morice et al.      | Surrogate | Cardiovascular            | Cardiovascular            | JAMA   | 2006 |
|    | Hallstrom et al.   | Final     | Cardiovascular            | Cardiovascular            | JAMA   | 2006 |
| 28 | Mutabingwa et al.  | Surrogate | Infectious disease        | Infectious disease        | Lancet | 2005 |
|    | DuPont et al.      | Final     | Infectious disease        | Infectious disease        | Annals | 2005 |
| 29 | Newell et al.      | Surrogate | Infectious disease        | Infectious disease        | Lancet | 2006 |
|    | Cisse et al.       | Final     | Infectious disease        | Infectious disease        | Lancet | 2006 |
| 30 | Penny et al.       | Surrogate | Other                     | Other                     | Lancet | 2005 |
|    | Genovese et al.    | Final     | Other                     | Other                     | NEJM   | 2005 |
| 31 | Poston et al.      | Surrogate | Obstetrics                | Obstetrics                | Lancet | 2006 |
|    | Derman et al.      | Final     | Obstetrics                | Obstetrics                | Lancet | 2006 |
| 32 | Roumie et al.      | Surrogate | Cardiovascular            | Cardiovascular            | Annals | 2006 |
|    | Sisk et al.        | Final     | Cardiovascular            | Cardiovascular            | Annals | 2006 |
| 33 | Sato et al.        | Surrogate | Other                     | Cardiovascular            | JAMA   | 2005 |
|    | Todd et al.        | Final     | Other                     | Cardiovascular            | NEJM   | 2005 |
| 34 | Singh et al.       | Surrogate | Cardiovascular            | Cardiovascular            | NEJM   | 2005 |
|    | Gershlick et al.   | Final     | Cardiovascular            | Cardiovascular            | NEJM   | 2005 |
| 35 | Spiro et al.       | Surrogate | Infectious disease        | Other                     | JAMA   | 2006 |
|    | Thior et al.       | Final     | Infectious disease        | Other                     | JAMA   | 2006 |

|    |                   |           |                    |                    |        |      |
|----|-------------------|-----------|--------------------|--------------------|--------|------|
| 36 | Steures et al.    | Surrogate | Obstetrics         | Obstetrics         | Lancet | 2006 |
|    | Bloom et al.      | Final     | Obstetrics         | Obstetrics         | NEJM   | 2006 |
| 37 | Stone et al.      | Surrogate | Cardiovascular     | Cardiovascular     | JAMA   | 2005 |
|    | Mehta et al.      | Final     | Cardiovascular     | Cardiovascular     | JAMA   | 2005 |
| 38 | Sutherland et al. | Surrogate | Infectious disease | Infectious disease | PLoS   | 2005 |
|    | Auvert et al.     | Final     | Infectious disease | Infectious disease | PLoS   | 2005 |
| 39 | Tagbor et al.     | Surrogate | Infectious disease | Obstetrics         | Lancet | 2006 |
|    | Mullany et al.    | Final     | Infectious disease | Obstetrics         | Lancet | 2006 |
| 40 | Taylor et al.     | Surrogate | Infectious disease | Infectious disease | Lancet | 2005 |
|    | Dondorp et al.    | Final     | Infectious disease | Infectious disease | Lancet | 2005 |
| 41 | Tonstad et al.    | Surrogate | Other              | Other              | JAMA   | 2006 |
|    | Walsh et al.      | Final     | Other              | Other              | JAMA   | 2006 |
| 42 | Wright et al.     | Surrogate | Other              | Other              | Lancet | 2005 |
|    | Belda et al.      | Final     | Other              | Other              | JAMA   | 2005 |
| 43 | Zhang et al.      | Surrogate | Cardiovascular     | Cardiovascular     | Lancet | 2005 |
|    | Dahlof et al.     | Final     | Cardiovascular     | Cardiovascular     | Lancet | 2005 |

## eREFERENCES

1. Abraham E, Laterre PF, Garg R, et al. Drotrecogin alfa (activated) for adults with severe sepsis and a low risk of death. *The New England journal of medicine*. Sep 29 2005;353(13):1332-1341.
2. Alderman H, Konde-Lule J, Sebuliba I, Bundy D, Hall A. Effect on weight gain of routinely giving albendazole to preschool children during child health days in Uganda: cluster randomised controlled trial. *BMJ (Clinical research ed.)*. Jul 15 2006;333(7559):122.
3. Amarenco P, Bogousslavsky J, Callahan A, 3rd, et al. High-dose atorvastatin after stroke or transient ischemic attack. *The New England journal of medicine*. Aug 10 2006;355(6):549-559.
4. Ananworanich J, Gayet-Ageron A, Le Braz M, et al. CD4-guided scheduled treatment interruptions compared with continuous therapy for patients infected with HIV-1: results of the Staccato randomised trial. *Lancet*. Aug 5 2006;368(9534):459-465.

5. Antman EM, Morrow DA, McCabe CH, et al. Enoxaparin versus unfractionated heparin with fibrinolysis for ST-elevation myocardial infarction. *The New England journal of medicine*. Apr 6 2006;354(14):1477-1488.
6. Arber N, Eagle CJ, Spicak J, et al. Celecoxib for the prevention of colorectal adenomatous polyps. *The New England journal of medicine*. Aug 31 2006;355(9):885-895.
7. Arnon SS, Schechter R, Maslanka SE, Jewell NP, Hatheway CL. Human botulism immune globulin for the treatment of infant botulism. *The New England journal of medicine*. Feb 2 2006;354(5):462-471.
8. Asarnow JR, Jaycox LH, Duan N, et al. Effectiveness of a quality improvement intervention for adolescent depression in primary care clinics: a randomized controlled trial. *JAMA : the journal of the American Medical Association*. Jan 19 2005;293(3):311-319.
9. Primary versus tenecteplase-facilitated percutaneous coronary intervention in patients with ST-segment elevation acute myocardial infarction (ASSENT-4 PCI): randomised trial. *Lancet*. Feb 18 2006;367(9510):569-578.
10. Auvert B, Taljaard D, Lagarde E, Sobngwi-Tambekou J, Sitta R, Puren A. Randomized, controlled intervention trial of male circumcision for reduction of HIV infection risk: the ANRS 1265 Trial. *PLoS medicine*. Nov 2005;2(11):e298.
11. Barlogie B, Tricot G, Anaissie E, et al. Thalidomide and hematopoietic-cell transplantation for multiple myeloma. *The New England journal of medicine*. Mar 9 2006;354(10):1021-1030.
12. Barrett-Connor E, Mosca L, Collins P, et al. Effects of raloxifene on cardiovascular events and breast cancer in postmenopausal women. *The New England journal of medicine*. Jul 13 2006;355(2):125-137.
13. Belda FJ, Aguilera L, Garcia de la Asuncion J, et al. Supplemental perioperative oxygen and the risk of surgical wound infection: a randomized controlled trial. *JAMA : the journal of the American Medical Association*. Oct 26 2005;294(16):2035-2042.
14. Belfort R, Harrison SA, Brown K, et al. A placebo-controlled trial of pioglitazone in subjects with nonalcoholic steatohepatitis. *The New England journal of medicine*. Nov 30 2006;355(22):2297-2307.
15. Bellinger DC, Trachtenberg F, Barregard L, et al. Neuropsychological and renal effects of dental amalgam in children: a randomized clinical trial. *JAMA : the journal of the American Medical Association*. Apr 19 2006;295(15):1775-1783.
16. Bertagnolli MM, Eagle CJ, Zauber AG, et al. Celecoxib for the prevention of sporadic colorectal adenomas. *The New England journal of medicine*. Aug 31 2006;355(9):873-884.
17. Binanay C, Califf RM, Hasselblad V, et al. Evaluation study of congestive heart failure and pulmonary artery catheterization effectiveness: the ESCAPE trial. *JAMA : the journal of the American Medical Association*. Oct 5 2005;294(13):1625-1633.
18. Bisgaard H, Hermansen MN, Loland L, Halkjaer LB, Buchvald F. Intermittent inhaled corticosteroids in infants with episodic wheezing. *The New England journal of medicine*. May 11 2006;354(19):1998-2005.

19. Black DM, Schwartz AV, Ensrud KE, et al. Effects of continuing or stopping alendronate after 5 years of treatment: the Fracture Intervention Trial Long-term Extension (FLEX): a randomized trial. *JAMA : the journal of the American Medical Association*. Dec 27 2006;296(24):2927-2938.
20. Blankensteijn JD, de Jong SE, Prinssen M, et al. Two-year outcomes after conventional or endovascular repair of abdominal aortic aneurysms. *The New England journal of medicine*. Jun 9 2005;352(23):2398-2405.
21. Bloom SL, Spong CY, Thom E, et al. Fetal pulse oximetry and cesarean delivery. *The New England journal of medicine*. Nov 23 2006;355(21):2195-2202.
22. Brubaker L, Cundiff GW, Fine P, et al. Abdominal sacrocolpopexy with Burch colposuspension to reduce urinary stress incontinence. *The New England journal of medicine*. Apr 13 2006;354(15):1557-1566.
23. Burns KE, Chu MW, Novick RJ, et al. Perioperative N-acetylcysteine to prevent renal dysfunction in high-risk patients undergoing cabg surgery: a randomized controlled trial. *JAMA : the journal of the American Medical Association*. Jul 20 2005;294(3):342-350.
24. BATTERY JP, Riddell A, McVernon J, et al. Immunogenicity and safety of a combination pneumococcal-meningococcal vaccine in infants: a randomized controlled trial. *JAMA : the journal of the American Medical Association*. Apr 13 2005;293(14):1751-1758.
25. Carratala J, Fernandez-Sabe N, Ortega L, et al. Outpatient care compared with hospitalization for community-acquired pneumonia: a randomized trial in low-risk patients. *Annals of internal medicine*. Feb 1 2005;142(3):165-172.
26. Casarett D, Karlawish J, Morales K, Crowley R, Mirsch T, Asch DA. Improving the use of hospice services in nursing homes: a randomized controlled trial. *JAMA : the journal of the American Medical Association*. Jul 13 2005;294(2):211-217.
27. Chan HL, Leung NW, Hui AY, et al. A randomized, controlled trial of combination therapy for chronic hepatitis B: comparing pegylated interferon-alpha2b and lamivudine with lamivudine alone. *Annals of internal medicine*. Feb 15 2005;142(4):240-250.
28. Chanoine JP, Hampl S, Jensen C, Boldrin M, Hauptman J. Effect of orlistat on weight and body composition in obese adolescents: a randomized controlled trial. *JAMA : the journal of the American Medical Association*. Jun 15 2005;293(23):2873-2883.
29. Chaparro CM, Neufeld LM, Tena Alavez G, Eguia-Liz Cedillo R, Dewey KG. Effect of timing of umbilical cord clamping on iron status in Mexican infants: a randomised controlled trial. *Lancet*. Jun 17 2006;367(9527):1997-2004.
30. Cisse B, Sokhna C, Boulanger D, et al. Seasonal intermittent preventive treatment with artesunate and sulfadoxine-pyrimethamine for prevention of malaria in Senegalese children: a randomised, placebo-controlled, double-blind trial. *Lancet*. Feb 25 2006;367(9511):659-667.

31. Cleland JG, Daubert JC, Erdmann E, et al. The effect of cardiac resynchronization on morbidity and mortality in heart failure. *The New England journal of medicine*. Apr 14 2005;352(15):1539-1549.
32. Clifford DB, Evans S, Yang Y, et al. Impact of efavirenz on neuropsychological performance and symptoms in HIV-infected individuals. *Annals of internal medicine*. Nov 15 2005;143(10):714-721.
33. Cook NR, Lee IM, Gaziano JM, et al. Low-dose aspirin in the primary prevention of cancer: the Women's Health Study: a randomized controlled trial. *JAMA : the journal of the American Medical Association*. Jul 6 2005;294(1):47-55.
34. Cooper PJ, Chico ME, Vaca MG, et al. Effect of albendazole treatments on the prevalence of atopy in children living in communities endemic for geohelminth parasites: a cluster-randomised trial. *Lancet*. May 13 2006;367(9522):1598-1603.
35. Corwin P, Toop L, McGeoch G, et al. Randomised controlled trial of intravenous antibiotic treatment for cellulitis at home compared with hospital. *BMJ (Clinical research ed.)*. Jan 15 2005;330(7483):129.
36. Coutinho SB, de Lira PI, de Carvalho Lima M, Ashworth A. Comparison of the effect of two systems for the promotion of exclusive breastfeeding. *Lancet*. Sep 24-30 2005;366(9491):1094-1100.
37. Cowell SJ, Newby DE, Prescott RJ, et al. A randomized trial of intensive lipid-lowering therapy in calcific aortic stenosis. *The New England journal of medicine*. Jun 9 2005;352(23):2389-2397.
38. Crawford BA, Kam C, Pavlovic J, et al. Zoledronic acid prevents bone loss after liver transplantation: a randomized, double-blind, placebo-controlled trial. *Annals of internal medicine*. Feb 21 2006;144(4):239-248.
39. Crowther CA, Hiller JE, Moss JR, McPhee AJ, Jeffries WS, Robinson JS. Effect of treatment of gestational diabetes mellitus on pregnancy outcomes. *The New England journal of medicine*. Jun 16 2005;352(24):2477-2486.
40. Cunningham D, Allum WH, Stenning SP, et al. Perioperative chemotherapy versus surgery alone for resectable gastroesophageal cancer. *The New England journal of medicine*. Jul 6 2006;355(1):11-20.
41. Cutts FT, Zaman SM, Enwere G, et al. Efficacy of nine-valent pneumococcal conjugate vaccine against pneumonia and invasive pneumococcal disease in The Gambia: randomised, double-blind, placebo-controlled trial. *Lancet*. Mar 26-Apr 1 2005;365(9465):1139-1146.
42. Dahlof B, Sever PS, Poulter NR, et al. Prevention of cardiovascular events with an antihypertensive regimen of amlodipine adding perindopril as required versus atenolol adding bendroflumethiazide as required, in the Anglo-Scandinavian Cardiac Outcomes Trial-Blood Pressure Lowering Arm (ASCOT-BPLA): a multicentre randomised controlled trial. *Lancet*. Sep 10-16 2005;366(9489):895-906.
43. Darmstadt GL, Saha SK, Ahmed AS, et al. Effect of topical treatment with skin barrier-enhancing emollients on nosocomial infections in preterm infants in Bangladesh: a randomised controlled trial. *Lancet*. Mar 19-25 2005;365(9464):1039-1045.

44. Davey Smith G, Bracha Y, Svendsen KH, Neaton JD, Haffner SM, Kuller LH. Incidence of type 2 diabetes in the randomized multiple risk factor intervention trial. *Annals of internal medicine*. Mar 1 2005;142(5):313-322.
45. de Nijs RN, Jacobs JW, Lems WF, et al. Alendronate or alfacalcidol in glucocorticoid-induced osteoporosis. *The New England journal of medicine*. Aug 17 2006;355(7):675-684.
46. Demedts M, Behr J, Buhl R, et al. High-dose acetylcysteine in idiopathic pulmonary fibrosis. *The New England journal of medicine*. Nov 24 2005;353(21):2229-2242.
47. Dennis MS, Lewis SC, Warlow C. Routine oral nutritional supplementation for stroke patients in hospital (FOOD): a multicentre randomised controlled trial. *Lancet*. Feb 26-Mar 4 2005;365(9461):755-763.
48. Derman RJ, Kodkany BS, Goudar SS, et al. Oral misoprostol in preventing postpartum haemorrhage in resource-poor communities: a randomised controlled trial. *Lancet*. Oct 7 2006;368(9543):1248-1253.
49. Dodd JM, Crowther CA, Robinson JS. Oral misoprostol for induction of labour at term: randomised controlled trial. *BMJ (Clinical research ed.)*. Mar 4 2006;332(7540):509-513.
50. Donaldson SH, Bennett WD, Zeman KL, Knowles MR, Tarran R, Boucher RC. Mucus clearance and lung function in cystic fibrosis with hypertonic saline. *The New England journal of medicine*. Jan 19 2006;354(3):241-250.
51. Dondorp A, Nosten F, Stepniewska K, Day N, White N. Artesunate versus quinine for treatment of severe falciparum malaria: a randomised trial. *Lancet*. Aug 27-Sep 2 2005;366(9487):717-725.
52. Dormandy JA, Charbonnel B, Eckland DJ, et al. Secondary prevention of macrovascular events in patients with type 2 diabetes in the PROactive Study (PROspective pioglitAzone Clinical Trial In macroVascular Events): a randomised controlled trial. *Lancet*. Oct 8 2005;366(9493):1279-1289.
53. Doukas G, Samani NJ, Alexiou C, et al. Left atrial radiofrequency ablation during mitral valve surgery for continuous atrial fibrillation: a randomized controlled trial. *JAMA : the journal of the American Medical Association*. Nov 9 2005;294(18):2323-2329.
54. Gerstein HC, Yusuf S, Bosch J, et al. Effect of rosiglitazone on the frequency of diabetes in patients with impaired glucose tolerance or impaired fasting glucose: a randomised controlled trial. *Lancet*. Sep 23 2006;368(9541):1096-1105.
55. Drummond AE, Pearson B, Lincoln NB, Berman P. Ten year follow-up of a randomised controlled trial of care in a stroke rehabilitation unit. *BMJ (Clinical research ed.)*. Sep 3 2005;331(7515):491-492.
56. DuPont HL, Jiang ZD, Okhuysen PC, et al. A randomized, double-blind, placebo-controlled trial of rifaximin to prevent travelers' diarrhea. *Annals of internal medicine*. May 17 2005;142(10):805-812.

57. Eggermont AM, Suci S, MacKie R, et al. Post-surgery adjuvant therapy with intermediate doses of interferon alfa 2b versus observation in patients with stage IIb/III melanoma (EORTC 18952): randomised controlled trial. *Lancet*. Oct 1 2005;366(9492):1189-1196.
58. Elkins MR, Robinson M, Rose BR, et al. A controlled trial of long-term inhaled hypertonic saline in patients with cystic fibrosis. *The New England journal of medicine*. Jan 19 2006;354(3):229-240.
59. Fitzgibbons RJ, Jr., Giobbie-Hurder A, Gibbs JO, et al. Watchful waiting vs repair of inguinal hernia in minimally symptomatic men: a randomized clinical trial. *JAMA : the journal of the American Medical Association*. Jan 18 2006;295(3):285-292.
60. Fitzmaurice DA, Murray ET, McCahon D, et al. Self management of oral anticoagulation: randomised trial. *BMJ (Clinical research ed.)*. Nov 5 2005;331(7524):1057.
61. Fleischmann E, Lenhardt R, Kurz A, et al. Nitrous oxide and risk of surgical wound infection: a randomised trial. *Lancet*. Sep 24-30 2005;366(9491):1101-1107.
62. Freedman SB, Adler M, Seshadri R, Powell EC. Oral ondansetron for gastroenteritis in a pediatric emergency department. *The New England journal of medicine*. Apr 20 2006;354(16):1698-1705.
63. Garly ML, Bale C, Martins CL, et al. Prophylactic antibiotics to prevent pneumonia and other complications after measles: community based randomised double blind placebo controlled trial in Guinea-Bissau. *BMJ (Clinical research ed.)*. Dec 16 2006;333(7581):1245.
64. Genovese MC, Becker JC, Schiff M, et al. Abatacept for rheumatoid arthritis refractory to tumor necrosis factor alpha inhibition. *The New England journal of medicine*. Sep 15 2005;353(11):1114-1123.
65. Gershlick AH, Stephens-Lloyd A, Hughes S, et al. Rescue angioplasty after failed thrombolytic therapy for acute myocardial infarction. *The New England journal of medicine*. Dec 29 2005;353(26):2758-2768.
66. Randomised trial of telephone intervention in chronic heart failure: DIAL trial. *BMJ (Clinical research ed.)*. Aug 20 2005;331(7514):425.
67. Gilron I, Bailey JM, Tu D, Holden RR, Weaver DF, Houlden RL. Morphine, gabapentin, or their combination for neuropathic pain. *The New England journal of medicine*. Mar 31 2005;352(13):1324-1334.
68. Golden MR, Whittington WL, Handsfield HH, et al. Effect of expedited treatment of sex partners on recurrent or persistent gonorrhoea or chlamydial infection. *The New England journal of medicine*. Feb 17 2005;352(7):676-685.
69. Groszmann RJ, Garcia-Tsao G, Bosch J, et al. Beta-blockers to prevent gastroesophageal varices in patients with cirrhosis. *The New England journal of medicine*. Nov 24 2005;353(21):2254-2261.
70. Guilbert TW, Morgan WJ, Zeiger RS, et al. Long-term inhaled corticosteroids in preschool children at high risk for asthma. *The New England journal of medicine*. May 11 2006;354(19):1985-1997.

71. Gulick RM, Ribaud HJ, Shikuma CM, et al. Three- vs four-drug antiretroviral regimens for the initial treatment of HIV-1 infection: a randomized controlled trial. *JAMA : the journal of the American Medical Association*. Aug 16 2006;296(7):769-781.
72. Hadziyannis SJ, Tassopoulos NC, Heathcote EJ, et al. Long-term therapy with adefovir dipivoxil for HBeAg-negative chronic hepatitis B. *The New England journal of medicine*. Jun 30 2005;352(26):2673-2681.
73. Hallstrom A, Rea TD, Sayre MR, et al. Manual chest compression vs use of an automated chest compression device during resuscitation following out-of-hospital cardiac arrest: a randomized trial. *JAMA : the journal of the American Medical Association*. Jun 14 2006;295(22):2620-2628.
74. Harvey S, Harrison DA, Singer M, et al. Assessment of the clinical effectiveness of pulmonary artery catheters in management of patients in intensive care (PAC-Man): a randomised controlled trial. *Lancet*. Aug 6-12 2005;366(9484):472-477.
75. Hayward AC, Harling R, Wetten S, et al. Effectiveness of an influenza vaccine programme for care home staff to prevent death, morbidity, and health service use among residents: cluster randomised controlled trial. *BMJ (Clinical research ed.)*. Dec 16 2006;333(7581):1241.
76. He J, Gu D, Wu X, Chen J, Duan X, Whelton PK. Effect of soybean protein on blood pressure: a randomized, controlled trial. *Annals of internal medicine*. Jul 5 2005;143(1):1-9.
77. Hennerici MG, Kay R, Bogousslavsky J, Lenzi GL, Verstraete M, Orgogozo JM. Intravenous ancrod for acute ischaemic stroke in the European Stroke Treatment with Ancrod Trial: a randomised controlled trial. *Lancet*. Nov 25 2006;368(9550):1871-1878.
78. Hillmen P, Young NS, Schubert J, et al. The complement inhibitor eculizumab in paroxysmal nocturnal hemoglobinuria. *The New England journal of medicine*. Sep 21 2006;355(12):1233-1243.
79. Holtmann G, Talley NJ, Liebrechts T, Adam B, Parow C. A placebo-controlled trial of itopride in functional dyspepsia. *The New England journal of medicine*. Feb 23 2006;354(8):832-840.
80. Honer WG, Thornton AE, Chen EY, et al. Clozapine alone versus clozapine and risperidone with refractory schizophrenia. *The New England journal of medicine*. Feb 2 2006;354(5):472-482.
81. Hooton TM, Scholes D, Gupta K, Stapleton AE, Roberts PL, Stamm WE. Amoxicillin-clavulanate vs ciprofloxacin for the treatment of uncomplicated cystitis in women: a randomized trial. *JAMA : the journal of the American Medical Association*. Feb 23 2005;293(8):949-955.
82. Howard BV, Manson JE, Stefanick ML, et al. Low-fat dietary pattern and weight change over 7 years: the Women's Health Initiative Dietary Modification Trial. *JAMA : the journal of the American Medical Association*. Jan 4 2006;295(1):39-49.

83. Howard BV, Van Horn L, Hsia J, et al. Low-fat dietary pattern and risk of cardiovascular disease: the Women's Health Initiative Randomized Controlled Dietary Modification Trial. *JAMA : the journal of the American Medical Association*. Feb 8 2006;295(6):655-666.
84. Janssen HL, van Zonneveld M, Senturk H, et al. Pegylated interferon alfa-2b alone or in combination with lamivudine for HBeAg-positive chronic hepatitis B: a randomised trial. *Lancet*. Jan 8-14 2005;365(9454):123-129.
85. Janssens S, Dubois C, Bogaert J, et al. Autologous bone marrow-derived stem-cell transfer in patients with ST-segment elevation myocardial infarction: double-blind, randomised controlled trial. *Lancet*. Jan 14 2006;367(9505):113-121.
86. Jokhio AH, Winter HR, Cheng KK. An intervention involving traditional birth attendants and perinatal and maternal mortality in Pakistan. *The New England journal of medicine*. May 19 2005;352(20):2091-2099.
87. Julius S, Nesbitt SD, Egan BM, et al. Feasibility of treating prehypertension with an angiotensin-receptor blocker. *The New England journal of medicine*. Apr 20 2006;354(16):1685-1697.
88. Kaplan SA, Roehrborn CG, Rovner ES, Carlsson M, Bavendam T, Guan Z. Tolterodine and tamsulosin for treatment of men with lower urinary tract symptoms and overactive bladder: a randomized controlled trial. *JAMA : the journal of the American Medical Association*. Nov 15 2006;296(19):2319-2328.
89. Kastrati A, Mehilli J, von Beckerath N, et al. Sirolimus-eluting stent or paclitaxel-eluting stent vs balloon angioplasty for prevention of recurrences in patients with coronary in-stent restenosis: a randomized controlled trial. *JAMA : the journal of the American Medical Association*. Jan 12 2005;293(2):165-171.
90. Keech A, Simes RJ, Barter P, et al. Effects of long-term fenofibrate therapy on cardiovascular events in 9795 people with type 2 diabetes mellitus (the FIELD study): randomised controlled trial. *Lancet*. Nov 26 2005;366(9500):1849-1861.
91. Kelly JA, Amirkhania YA, Kabakchieva E, et al. Prevention of HIV and sexually transmitted diseases in high risk social networks of young Roma (Gypsy) men in Bulgaria: randomised controlled trial. *BMJ (Clinical research ed.)*. Nov 25 2006;333(7578):1098.
92. Kennedy T, Jones R, Darnley S, Seed P, Wessely S, Chalder T. Cognitive behaviour therapy in addition to antispasmodic treatment for irritable bowel syndrome in primary care: randomised controlled trial. *BMJ (Clinical research ed.)*. Aug 20 2005;331(7514):435.
93. Keymeulen B, Vandemeulebroucke E, Ziegler AG, et al. Insulin needs after CD3-antibody therapy in new-onset type 1 diabetes. *The New England journal of medicine*. Jun 23 2005;352(25):2598-2608.
94. Kinsella JP, Cutter GR, Walsh WF, et al. Early inhaled nitric oxide therapy in premature newborns with respiratory failure. *The New England journal of medicine*. Jul 27 2006;355(4):354-364.

95. Korzenik JR, Dieckgraefe BK, Valentine JF, Hausman DF, Gilbert MJ. Sargramostim for active Crohn's disease. *The New England journal of medicine*. May 26 2005;352(21):2193-2201.
96. Kroeger A, Lenhart A, Ochoa M, et al. Effective control of dengue vectors with curtains and water container covers treated with insecticide in Mexico and Venezuela: cluster randomised trials. *BMJ (Clinical research ed.)*. May 27 2006;332(7552):1247-1252.
97. Lai CL, Shouval D, Lok AS, et al. Entecavir versus lamivudine for patients with HBeAg-negative chronic hepatitis B. *The New England journal of medicine*. Mar 9 2006;354(10):1011-1020.
98. Lau GK, Piratvisuth T, Luo KX, et al. Peginterferon Alfa-2a, lamivudine, and the combination for HBeAg-positive chronic hepatitis B. *The New England journal of medicine*. Jun 30 2005;352(26):2682-2695.
99. Laufer MK, Thesing PC, Eddington ND, et al. Return of chloroquine antimalarial efficacy in Malawi. *The New England journal of medicine*. Nov 9 2006;355(19):1959-1966.
100. Lee JK, Grace KA, Taylor AJ. Effect of a pharmacy care program on medication adherence and persistence, blood pressure, and low-density lipoprotein cholesterol: a randomized controlled trial. *JAMA : the journal of the American Medical Association*. Dec 6 2006;296(21):2563-2571.
101. Lee IM, Cook NR, Gaziano JM, et al. Vitamin E in the primary prevention of cardiovascular disease and cancer: the Women's Health Study: a randomized controlled trial. *JAMA : the journal of the American Medical Association*. Jul 6 2005;294(1):56-65.
102. Loeb M, Carusone SC, Goeree R, et al. Effect of a clinical pathway to reduce hospitalizations in nursing home residents with pneumonia: a randomized controlled trial. *JAMA : the journal of the American Medical Association*. Jun 7 2006;295(21):2503-2510.
103. Lonn E, Yusuf S, Arnold MJ, et al. Homocysteine lowering with folic acid and B vitamins in vascular disease. *The New England journal of medicine*. Apr 13 2006;354(15):1567-1577.
104. Lonn E, Bosch J, Yusuf S, et al. Effects of long-term vitamin E supplementation on cardiovascular events and cancer: a randomized controlled trial. *JAMA : the journal of the American Medical Association*. Mar 16 2005;293(11):1338-1347.
105. Lunde K, Solheim S, Aakhus S, et al. Intracoronary injection of mononuclear bone marrow cells in acute myocardial infarction. *The New England journal of medicine*. Sep 21 2006;355(12):1199-1209.
106. Mahaffey KW, Cohen M, Garg J, et al. High-risk patients with acute coronary syndromes treated with low-molecular-weight or unfractionated heparin: outcomes at 6 months and 1 year in the SYNERGY trial. *JAMA : the journal of the American Medical Association*. Nov 23 2005;294(20):2594-2600.

107. Marenzi G, Assanelli E, Marana I, et al. N-acetylcysteine and contrast-induced nephropathy in primary angioplasty. *The New England journal of medicine*. Jun 29 2006;354(26):2773-2782.
108. Marks LS, Mazer NA, Mostaghel E, et al. Effect of testosterone replacement therapy on prostate tissue in men with late-onset hypogonadism: a randomized controlled trial. *JAMA : the journal of the American Medical Association*. Nov 15 2006;296(19):2351-2361.
109. Maskell NA, Davies CW, Nunn AJ, et al. U.K. Controlled trial of intrapleural streptokinase for pleural infection. *The New England journal of medicine*. Mar 3 2005;352(9):865-874.
110. Mayer SA, Brun NC, Begtrup K, et al. Recombinant activated factor VII for acute intracerebral hemorrhage. *The New England journal of medicine*. Feb 24 2005;352(8):777-785.
111. Mazzone T, Meyer PM, Feinstein SB, et al. Effect of pioglitazone compared with glimepiride on carotid intima-media thickness in type 2 diabetes: a randomized trial. *JAMA : the journal of the American Medical Association*. Dec 6 2006;296(21):2572-2581.
112. Mehta SR, Yusuf S, Diaz R, et al. Effect of glucose-insulin-potassium infusion on mortality in patients with acute ST-segment elevation myocardial infarction: the CREATE-ECLA randomized controlled trial. *JAMA : the journal of the American Medical Association*. Jan 26 2005;293(4):437-446.
113. Menendez-Jandula B, Souto JC, Oliver A, et al. Comparing self-management of oral anticoagulant therapy with clinic management: a randomized trial. *Annals of internal medicine*. Jan 4 2005;142(1):1-10.
114. Michalowicz BS, Hodges JS, DiAngelis AJ, et al. Treatment of periodontal disease and the risk of preterm birth. *The New England journal of medicine*. Nov 2 2006;355(18):1885-1894.
115. Moll E, Bossuyt PM, Korevaar JC, Lambalk CB, van der Veen F. Effect of clomifene citrate plus metformin and clomifene citrate plus placebo on induction of ovulation in women with newly diagnosed polycystic ovary syndrome: randomised double blind clinical trial. *BMJ (Clinical research ed.)*. Jun 24 2006;332(7556):1485.
116. Morice MC, Colombo A, Meier B, et al. Sirolimus- vs paclitaxel-eluting stents in de novo coronary artery lesions: the REALITY trial: a randomized controlled trial. *JAMA : the journal of the American Medical Association*. Feb 22 2006;295(8):895-904.
117. Moss RL, Dimmitt RA, Barnhart DC, et al. Laparotomy versus peritoneal drainage for necrotizing enterocolitis and perforation. *The New England journal of medicine*. May 25 2006;354(21):2225-2234.
118. Mullany LC, Darmstadt GL, Khatri SK, et al. Topical applications of chlorhexidine to the umbilical cord for prevention of omphalitis and neonatal mortality in southern Nepal: a community-based, cluster-randomised trial. *Lancet*. Mar 18 2006;367(9514):910-918.

119. Mutabingwa TK, Anthony D, Heller A, et al. Amodiaquine alone, amodiaquine+sulfadoxine-pyrimethamine, amodiaquine+artesunate, and artemether-lumefantrine for outpatient treatment of malaria in Tanzanian children: a four-arm randomised effectiveness trial. *Lancet*. Apr 23-29 2005;365(9469):1474-1480.
120. Nakamura H, Arakawa K, Itakura H, et al. Primary prevention of cardiovascular disease with pravastatin in Japan (MEGA Study): a prospective randomised controlled trial. *Lancet*. Sep 30 2006;368(9542):1155-1163.
121. Newell JN, Baral SC, Pande SB, Bam DS, Malla P. Family-member DOTS and community DOTS for tuberculosis control in Nepal: cluster-randomised controlled trial. *Lancet*. Mar 18 2006;367(9514):903-909.
122. Nissen SE, Tuzcu EM, Schoenhagen P, et al. Statin therapy, LDL cholesterol, C-reactive protein, and coronary artery disease. *The New England journal of medicine*. Jan 6 2005;352(1):29-38.
123. Nissen SE, Tuzcu EM, Brewer HB, et al. Effect of ACAT inhibition on the progression of coronary atherosclerosis. *The New England journal of medicine*. Mar 23 2006;354(12):1253-1263.
124. Oosterheert JJ, Bonten MJ, Schneider MM, et al. Effectiveness of early switch from intravenous to oral antibiotics in severe community acquired pneumonia: multicentre randomised trial. *BMJ (Clinical research ed.)*. Dec 9 2006;333(7580):1193.
125. Orchard TJ, Temprosa M, Goldberg R, et al. The effect of metformin and intensive lifestyle intervention on the metabolic syndrome: the Diabetes Prevention Program randomized trial. *Annals of internal medicine*. Apr 19 2005;142(8):611-619.
126. Osrin D, Vaidya A, Shrestha Y, et al. Effects of antenatal multiple micronutrient supplementation on birthweight and gestational duration in Nepal: double-blind, randomised controlled trial. *Lancet*. Mar 12-18 2005;365(9463):955-962.
127. Palareti G, Cosmi B, Legnani C, et al. D-dimer testing to determine the duration of anticoagulation therapy. *The New England journal of medicine*. Oct 26 2006;355(17):1780-1789.
128. Palumbo A, Brinchen S, Caravita T, et al. Oral melphalan and prednisone chemotherapy plus thalidomide compared with melphalan and prednisone alone in elderly patients with multiple myeloma: randomised controlled trial. *Lancet*. Mar 11 2006;367(9513):825-831.
129. Paradise JL, Campbell TF, Dollaghan CA, et al. Developmental outcomes after early or delayed insertion of tympanostomy tubes. *The New England journal of medicine*. Aug 11 2005;353(6):576-586.
130. Pedersen TR, Faergeman O, Kastelein JJ, et al. High-dose atorvastatin vs usual-dose simvastatin for secondary prevention after myocardial infarction: the IDEAL study: a randomized controlled trial. *JAMA : the journal of the American Medical Association*. Nov 16 2005;294(19):2437-2445.
131. Penny ME, Creed-Kanashiro HM, Robert RC, Narro MR, Caulfield LE, Black RE. Effectiveness of an educational intervention delivered through the health services to improve nutrition in young children: a cluster-randomised controlled trial. *Lancet*. May 28-Jun 3 2005;365(9474):1863-1872.

132. Pimentel M, Park S, Mirocha J, Kane SV, Kong Y. The effect of a nonabsorbed oral antibiotic (rifaximin) on the symptoms of the irritable bowel syndrome: a randomized trial. *Annals of internal medicine*. Oct 17 2006;145(8):557-563.
133. Poston L, Briley AL, Seed PT, Kelly FJ, Shennan AH. Vitamin C and vitamin E in pregnant women at risk for pre-eclampsia (VIP trial): randomised placebo-controlled trial. *Lancet*. Apr 8 2006;367(9517):1145-1154.
134. Poustie VJ, Russell JE, Watling RM, Ashby D, Smyth RL. Oral protein energy supplements for children with cystic fibrosis: CALICO multicentre randomised controlled trial. *BMJ (Clinical research ed.)*. Mar 18 2006;332(7542):632-636.
135. Prymula R, Peeters P, Chrobok V, et al. Pneumococcal capsular polysaccharides conjugated to protein D for prevention of acute otitis media caused by both *Streptococcus pneumoniae* and non-typable *Haemophilus influenzae*: a randomised double-blind efficacy study. *Lancet*. Mar 4 2006;367(9512):740-748.
136. Puhan MA, Suarez A, Lo Cascio C, Zahn A, Heitz M, Braendli O. Didgeridoo playing as alternative treatment for obstructive sleep apnoea syndrome: randomised controlled trial. *BMJ (Clinical research ed.)*. Feb 4 2006;332(7536):266-270.
137. Raine TR, Harper CC, Rocca CH, et al. Direct access to emergency contraception through pharmacies and effect on unintended pregnancy and STIs: a randomized controlled trial. *JAMA : the journal of the American Medical Association*. Jan 5 2005;293(1):54-62.
138. Reilly JJ, Kelly L, Montgomery C, et al. Physical activity to prevent obesity in young children: cluster randomised controlled trial. *BMJ (Clinical research ed.)*. Nov 18 2006;333(7577):1041.
139. Rodrigues LC, Pereira SM, Cunha SS, et al. Effect of BCG revaccination on incidence of tuberculosis in school-aged children in Brazil: the BCG-REVAC cluster-randomised trial. *Lancet*. Oct 8 2005;366(9493):1290-1295.
140. Rose PW, Harnden A, Brueggemann AB, et al. Chloramphenicol treatment for acute infective conjunctivitis in children in primary care: a randomised double-blind placebo-controlled trial. *Lancet*. Jul 2-8 2005;366(9479):37-43.
141. Roumie CL, Elasy TA, Greevy R, et al. Improving blood pressure control through provider education, provider alerts, and patient education: a cluster randomized trial. *Annals of internal medicine*. Aug 1 2006;145(3):165-175.
142. Rudick RA, Stuart WH, Calabresi PA, et al. Natalizumab plus interferon beta-1a for relapsing multiple sclerosis. *The New England journal of medicine*. Mar 2 2006;354(9):911-923.
143. Ruiz-Palacios GM, Perez-Schael I, Velazquez FR, et al. Safety and efficacy of an attenuated vaccine against severe rotavirus gastroenteritis. *The New England journal of medicine*. Jan 5 2006;354(1):11-22.
144. Rutgeerts P, Sandborn WJ, Feagan BG, et al. Infliximab for induction and maintenance therapy for ulcerative colitis. *The New England journal of medicine*. Dec 8 2005;353(23):2462-2476.
145. Sandborn WJ, Colombel JF, Enns R, et al. Natalizumab induction and maintenance therapy for Crohn's disease. *The New England journal of medicine*. Nov 3 2005;353(18):1912-1925.

146. Sato Y, Honda Y, Iwamoto J, Kanoko T, Satoh K. Effect of folate and mecobalamin on hip fractures in patients with stroke: a randomized controlled trial. *JAMA : the journal of the American Medical Association*. Mar 2 2005;293(9):1082-1088.
147. Scheller B, Hehrlein C, Bocksch W, et al. Treatment of coronary in-stent restenosis with a paclitaxel-coated balloon catheter. *The New England journal of medicine*. Nov 16 2006;355(20):2113-2124.
148. Schomig A, Mehilli J, Antoniucci D, et al. Mechanical reperfusion in patients with acute myocardial infarction presenting more than 12 hours from symptom onset: a randomized controlled trial. *JAMA : the journal of the American Medical Association*. Jun 15 2005;293(23):2865-2872.
149. Schrier RW, Gross P, Gheorghiadu M, et al. Tolvaptan, a selective oral vasopressin V2-receptor antagonist, for hyponatremia. *The New England journal of medicine*. Nov 16 2006;355(20):2099-2112.
150. Silverman E, Mouy R, Spiegel L, et al. Leflunomide or methotrexate for juvenile rheumatoid arthritis. *The New England journal of medicine*. Apr 21 2005;352(16):1655-1666.
151. Singh BN, Singh SN, Reda DJ, et al. Amiodarone versus sotalol for atrial fibrillation. *The New England journal of medicine*. May 5 2005;352(18):1861-1872.
152. Singh AK, Szczech L, Tang KL, et al. Correction of anemia with epoetin alfa in chronic kidney disease. *The New England journal of medicine*. Nov 16 2006;355(20):2085-2098.
153. Sisk JE, Hebert PL, Horowitz CR, McLaughlin MA, Wang JJ, Chassin MR. Effects of nurse management on the quality of heart failure care in minority communities: a randomized trial. *Annals of internal medicine*. Aug 15 2006;145(4):273-283.
154. El-Sadr WM, Lundgren JD, Neaton JD, et al. CD4+ count-guided interruption of antiretroviral treatment. *The New England journal of medicine*. Nov 30 2006;355(22):2283-2296.
155. Smith AD, Cowan JO, Brassett KP, Herbison GP, Taylor DR. Use of exhaled nitric oxide measurements to guide treatment in chronic asthma. *The New England journal of medicine*. May 26 2005;352(21):2163-2173.
156. Spiro DM, Tay KY, Arnold DH, Dziura JD, Baker MD, Shapiro ED. Wait-and-see prescription for the treatment of acute otitis media: a randomized controlled trial. *JAMA : the journal of the American Medical Association*. Sep 13 2006;296(10):1235-1241.
157. Squadrone V, Cocha M, Cerutti E, et al. Continuous positive airway pressure for treatment of postoperative hypoxemia: a randomized controlled trial. *JAMA : the journal of the American Medical Association*. Feb 2 2005;293(5):589-595.
158. Steinberg KP, Hudson LD, Goodman RB, et al. Efficacy and safety of corticosteroids for persistent acute respiratory distress syndrome. *The New England journal of medicine*. Apr 20 2006;354(16):1671-1684.

159. Steures P, van der Steeg JW, Hompes PG, et al. Intrauterine insemination with controlled ovarian hyperstimulation versus expectant management for couples with unexplained subfertility and an intermediate prognosis: a randomised clinical trial. *Lancet*. Jul 15 2006;368(9531):216-221.
160. Stone GW, Ellis SG, Cannon L, et al. Comparison of a polymer-based paclitaxel-eluting stent with a bare metal stent in patients with complex coronary artery disease: a randomized controlled trial. *JAMA : the journal of the American Medical Association*. Sep 14 2005;294(10):1215-1223.
161. Sutherland CJ, Ord R, Dunyo S, et al. Reduction of malaria transmission to Anopheles mosquitoes with a six-dose regimen of co-artemether. *PLoS medicine*. Apr 2005;2(4):e92.
162. Tagbor H, Bruce J, Browne E, Randal A, Greenwood B, Chandramohan D. Efficacy, safety, and tolerability of amodiaquine plus sulphadoxine-pyrimethamine used alone or in combination for malaria treatment in pregnancy: a randomised trial. *Lancet*. Oct 14 2006;368(9544):1349-1356.
163. Tashkin DP, Elashoff R, Clements PJ, et al. Cyclophosphamide versus placebo in scleroderma lung disease. *The New England journal of medicine*. Jun 22 2006;354(25):2655-2666.
164. Taylor MJ, Makunde WH, McGarry HF, Turner JD, Mand S, Hoerauf A. Macrofilaricidal activity after doxycycline treatment of *Wuchereria bancrofti*: a double-blind, randomised placebo-controlled trial. *Lancet*. Jun 18-24 2005;365(9477):2116-2121.
165. Thior I, Lockman S, Smeaton LM, et al. Breastfeeding plus infant zidovudine prophylaxis for 6 months vs formula feeding plus infant zidovudine for 1 month to reduce mother-to-child HIV transmission in Botswana: a randomized trial: the Mashi Study. *JAMA : the journal of the American Medical Association*. Aug 16 2006;296(7):794-805.
166. Todd MM, Hindman BJ, Clarke WR, Torner JC. Mild intraoperative hypothermia during surgery for intracranial aneurysm. *The New England journal of medicine*. Jan 13 2005;352(2):135-145.
167. Toff WD, Camm AJ, Skehan JD. Single-chamber versus dual-chamber pacing for high-grade atrioventricular block. *The New England journal of medicine*. Jul 14 2005;353(2):145-155.
168. Tonstad S, Tonnesen P, Hajek P, Williams KE, Billing CB, Reeves KR. Effect of maintenance therapy with varenicline on smoking cessation: a randomized controlled trial. *JAMA : the journal of the American Medical Association*. Jul 5 2006;296(1):64-71.
169. Trivedi MH, Fava M, Wisniewski SR, et al. Medication augmentation after the failure of SSRIs for depression. *The New England journal of medicine*. Mar 23 2006;354(12):1243-1252.
170. van Wijk JP, de Koning EJ, Cabezas MC, et al. Comparison of rosiglitazone and metformin for treating HIV lipodystrophy: a randomized trial. *Annals of internal medicine*. Sep 6 2005;143(5):337-346.

171. Vesikari T, Matson DO, Dennehy P, et al. Safety and efficacy of a pentavalent human-bovine (WC3) reassortant rotavirus vaccine. *The New England journal of medicine*. Jan 5 2006;354(1):23-33.
172. Vinsonneau C, Camus C, Combes A, et al. Continuous venovenous haemodiafiltration versus intermittent haemodialysis for acute renal failure in patients with multiple-organ dysfunction syndrome: a multicentre randomised trial. *Lancet*. Jul 29 2006;368(9533):379-385.
173. Walker SP, Chang SM, Powell CA, Simonoff E, Grantham-McGregor SM. Effects of psychosocial stimulation and dietary supplementation in early childhood on psychosocial functioning in late adolescence: follow-up of randomised controlled trial. *BMJ (Clinical research ed.)*. Sep 2 2006;333(7566):472.
174. Walsh BT, Kaplan AS, Attia E, et al. Fluoxetine after weight restoration in anorexia nervosa: a randomized controlled trial. *JAMA : the journal of the American Medical Association*. Jun 14 2006;295(22):2605-2612.
175. Wanner C, Krane V, Marz W, et al. Atorvastatin in patients with type 2 diabetes mellitus undergoing hemodialysis. *The New England journal of medicine*. Jul 21 2005;353(3):238-248.
176. Weinstein JN, Tosteson TD, Lurie JD, et al. Surgical vs nonoperative treatment for lumbar disk herniation: the Spine Patient Outcomes Research Trial (SPORT): a randomized trial. *JAMA : the journal of the American Medical Association*. Nov 22 2006;296(20):2441-2450.
177. West SK, Emerson PM, Mkocho H, et al. Intensive insecticide spraying for fly control after mass antibiotic treatment for trachoma in a hyperendemic setting: a randomised trial. *Lancet*. Aug 12 2006;368(9535):596-600.
178. Whitney EJ, Krasuski RA, Personius BE, et al. A randomized trial of a strategy for increasing high-density lipoprotein cholesterol levels: effects on progression of coronary heart disease and clinical events. *Annals of internal medicine*. Jan 18 2005;142(2):95-104.
179. Witt C, Brinkhaus B, Jena S, et al. Acupuncture in patients with osteoarthritis of the knee: a randomised trial. *Lancet*. Jul 9-15 2005;366(9480):136-143.
180. Wright JG, Wang EE, Owen JL, et al. Treatments for paediatric femoral fractures: a randomised trial. *Lancet*. Mar 26-Apr 1 2005;365(9465):1153-1158.
181. Yusuf S, Mehta SR, Chrolavicius S, et al. Effects of fondaparinux on mortality and reinfarction in patients with acute ST-segment elevation myocardial infarction: the OASIS-6 randomized trial. *JAMA : the journal of the American Medical Association*. Apr 5 2006;295(13):1519-1530.
182. Zar HJ, Cotton MF, Strauss S, et al. Effect of isoniazid prophylaxis on mortality and incidence of tuberculosis in children with HIV: randomised controlled trial. *BMJ (Clinical research ed.)*. Jan 20 2007;334(7585):136.

183. Zhang S, Wang S, Li Q, et al. Capillary leak syndrome in children with C4A-deficiency undergoing cardiac surgery with cardiopulmonary bypass: a double-blind, randomised controlled study. *Lancet*. Aug 13-19 2005;366(9485):556-562.
184. Zietman AL, DeSilvio ML, Slater JD, et al. Comparison of conventional-dose vs high-dose conformal radiation therapy in clinically localized adenocarcinoma of the prostate: a randomized controlled trial. *JAMA : the journal of the American Medical Association*. Sep 14 2005;294(10):1233-1239.
185. Zohnhofer D, Ott I, Mehilli J, et al. Stem cell mobilization by granulocyte colony-stimulating factor in patients with acute myocardial infarction: a randomized controlled trial. *JAMA : the journal of the American Medical Association*. Mar 1 2006;295(9):1003-1010.
