# Supplementary material
Source: PubMed Central journal article supplement (PMC4790791)

Funnel plot of surrogate and final trials included in our primary analysis

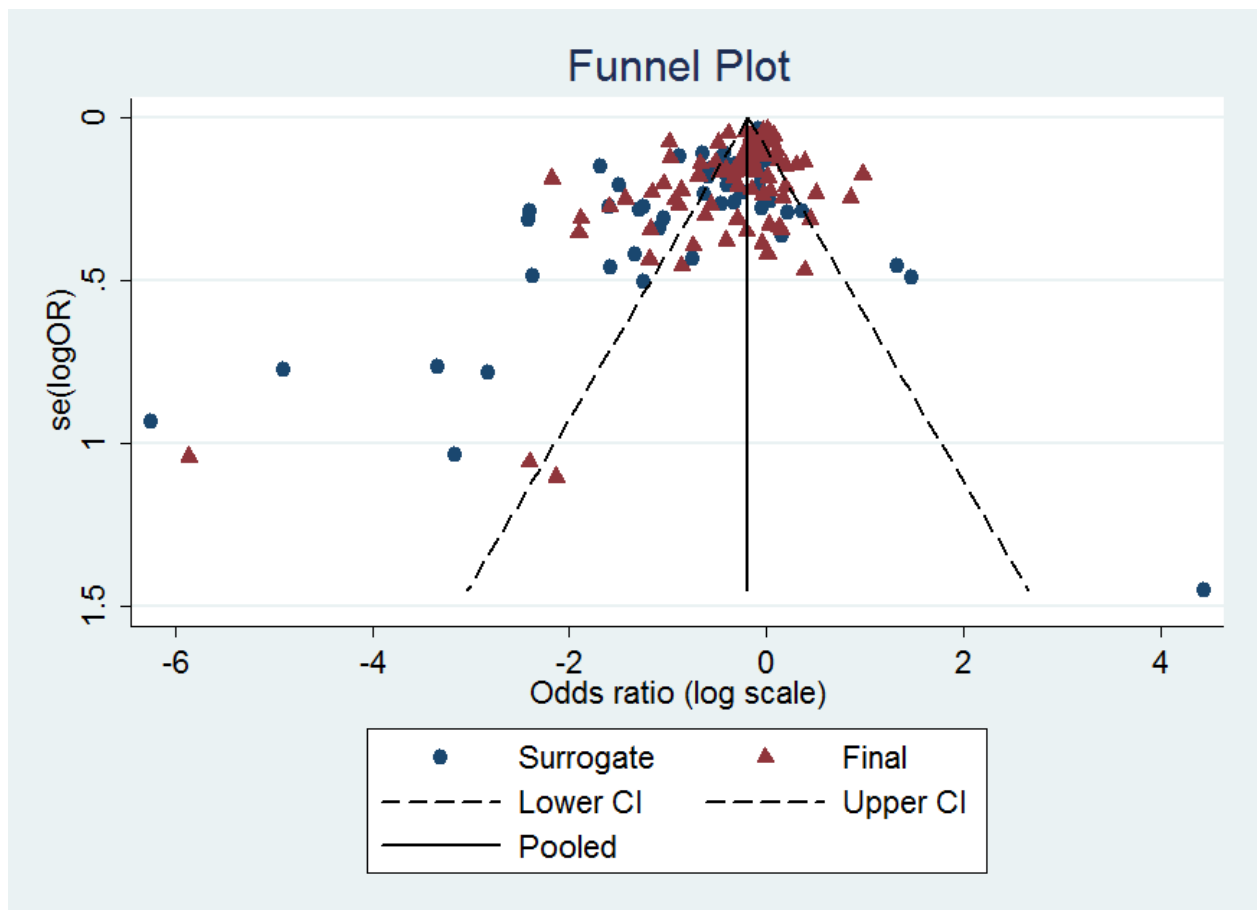

Supplement: ciao006838.wf1_default.pdf [file ciao006838.wf1_default.pdf]
